# Supplementary material for: Pre-Anthesis Cytokinin Applications Increase Table Grape Berry Firmness by Modulating Cell Wall Polysaccharides
Source: MDPI journal article supplement (doi:10.3390/plants10122642), 2021-12-01
Supplement: s1 [file s1]

**Table S1.** Primer sequences of genes used for RT-qPCR analysis.

| Gene Name                       | ID Gene (Genoscope.12X) | Sequence                                                                  |
|---------------------------------|-------------------------|---------------------------------------------------------------------------|
| <i>VvCDKF-4</i>                 | GSVIVT01022771001       | F 5'-GGAAGTGTGTTGGCGAGCAAT-3'<br>R 3'-CCCTGAGCTTCACAATGTTTGG-5'           |
| <i>VvCYC3-1</i>                 | GSVIVT01011079001       | F 5'- GTTATAGGAACCCCTCGGGTTT-3'<br>R 3'-TGGGCTACAGCCTGAGTACTT-5'          |
| <i>VvPME</i>                    | GSVIVG01028041001       | F 5'- CCAACTCCAGCACTACCAG-3'<br>R 3'-TCGGTTGCCCTTGATGTAAG-5'              |
| <i>VvPG</i>                     | GSVIVG01026985001       | F 5'- TCAACTCGCCTTCATGGAAC-3'<br>R 3'-CAATGTAGCAGTCTTCAATCCTTG-5'         |
| <i>VvEFl<math>\alpha</math></i> | GSVIVG01025147001       | F 5'-GAACTGGGTGCTTGATAGGC-3'<br>R 3'-AACCAAAATATCCGGAGTAAAAGA-5'          |
| <i>VvMVK</i>                    | GSVIVG01000037001       | F 5'- ATTGCCAACCCCTGCTATCAGGAAC-3'<br>R 3'- CGCCGATTCCAGCGATAAGACATT-5'   |
| <i>VvUBQ</i>                    | GSVIVG01008590001       | F 5'- GAACTTGCAGGAGGGGTTCTTGTA- 3'<br>R 3'- GAGCAGACAACTTTCTTGGGTGACT- 5' |
